# Supplementary material
Source: PubMed Central journal article supplement (PMC3188742)

Figure S1

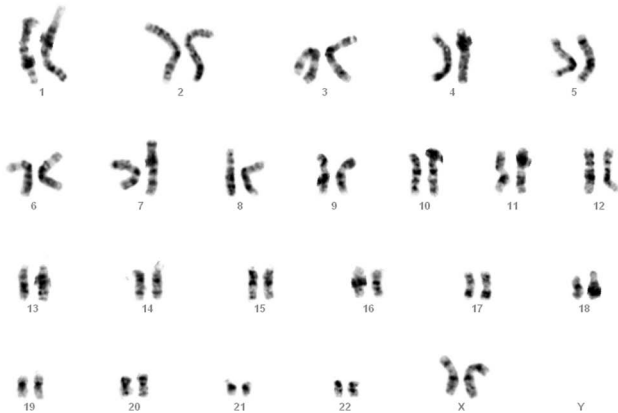

HSF6-46XX

Supplement: mt2011135x1.pdf [file mt2011135x1.pdf]

Figure S2

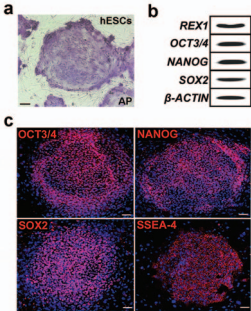

Supplement: mt2011135x2.pdf [file mt2011135x2.pdf]

Figure S3

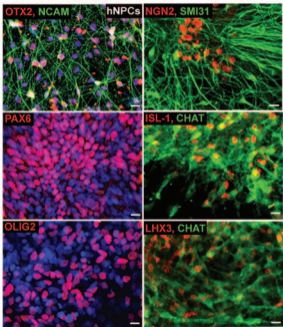

Supplement: mt2011135x3.pdf [file mt2011135x3.pdf]

Figure S4

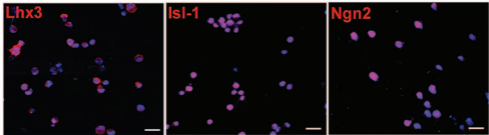

Supplement: mt2011135x4.pdf [file mt2011135x4.pdf]

**Figure S5**

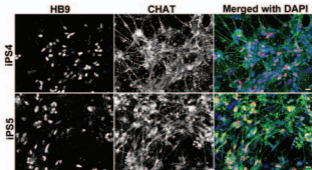

Supplement: mt2011135x5.pdf [file mt2011135x5.pdf]
